# Supplementary material for: A 3-Dimensional Quantitative Analysis of Volume Loss Following Submental Cryolipolysis
Source: Oxford University Press journal article supplement (doi:10.1093/asj/sjz145), 2019-05-16
Supplement: asj_40_2_123_s12.docx [file asj_40_2_123_s12.docx]

**Supplementary Figure 1**. The CoolMini Applicator (Allergan USA Ltd, Dublin, Ireland).

**Supplementary Figure 2**. Demonstrating the set up and positioning of the CoolSculpting system in use on a 72-year-old female patient (also featured in Figure 6).

**Supplemental Figure 3**. A graph displaying a linear regression analysis of the FACE-Q Score (y) versus Independent Observer Results (x), indicating the correlation between the two.
